# Supplementary material for: Exploration of SMM behavior of Ln2 complexes derived from thianaphthene-2-carboxylic acid
Source: Royal Society of Chemistry journal article supplement (doi:10.1039/c9dt01984g), 2019-01-01
Supplement: c9dt01984g1.pdf [file c9dt01984g1.pdf]

**Electronic Supplementary Informations**

**for**

**Exploration of SMM behavior of Ln<sub>2</sub>-complexes derived from thianaphthene-2-carboxylic acid**

**Soumava Biswas,\* Leena Mandal, Yongbing Shen and Masahiro Yamashita\***

**Table S1** Selected structural parameters (bond lengths in Å and angles in °) of Ln<sup>III</sup> center(s) (Ln=Dy for **1** and Ln=Tb for **2**) in **1** and **2** and Y<sup>III</sup> center(s) in **3**. Symmetry code: A, 2-x, 2-y, 1-z for **1**; A, 1-x, 2-y, 1-z for **2** and A, 1-x, 1-y, 2-z for **3**.

|            | Dy <sup>III</sup> | Tb <sup>III</sup> |          | Y <sup>III</sup> |           | Dy <sup>III</sup> | Tb <sup>III</sup> |           | Y <sup>III</sup> |
|------------|-------------------|-------------------|----------|------------------|-----------|-------------------|-------------------|-----------|------------------|
| Ln1-O1     | 2.497(5)          | 2.511(7)          | Y1-O1    | 2.494(4)         | O1-Ln1-O2 | 53.30(17)         | 53.1(2)           | O1-Y1-O2  | 53.88(13)        |
| Ln1-O2     | 2.399(5)          | 2.404(7)          | Y1-O2    | 2.376(4)         | O1-Ln1-O3 | 134.01(17)        | 133.4(2)          | O1-Y1-O3  | 134.55(14)       |
| Ln1-O3     | 2.396(5)          | 2.398(6)          | Y1-O3    | 2.375(4)         | O1-Ln1-O4 | 120.79(17)        | 120.3(2)          | O1-Y1-O4  | 121.07(13)       |
| Ln1-O4     | 2.485(5)          | 2.491(6)          | Y1-O4    | 2.473(4)         | O1-Ln1-O5 | 82.4(2)           | 82.5(3)           | O1-Y1-O5  | 82.39(15)        |
| Ln1-O5     | 2.265(6)          | 2.292(7)          | Y1-O5    | 2.252(4)         | O1-Ln1-O6 | 75.3(2)           | 75.0(2)           | O1-Y1-O6  | 75.32(15)        |
| Ln1-O6     | 2.315(6)          | 2.319(7)          | Y1-O6    | 2.294(4)         | O1-Ln1-O7 | 146.06(18)        | 145.5(2)          | O1-Y1-O7A | 146.05(14)       |
| Ln1-O7     | 2.348(5)          | 2.362(7)          | Y1-O7A   | 2.335(4)         | O1-Ln1-O8 | 76.94(19)         | 77.0(2)           | O1-Y1-O8  | 76.71(14)        |
| Ln1-O8     | 2.355(5)          | 2.375(7)          | Y1-O8    | 2.345(4)         | O2-Ln1-O3 | 86.03(18)         | 85.5(2)           | O2-Y1-O3  | 86.10(14)        |
| Ln1...Ln1A | 4.551             | 4.523             | Y1...Y1A | 4.602            | O2-Ln1-O4 | 74.94(18)         | 74.6(2)           | O2-Y1-O4  | 74.91(14)        |
|            |                   |                   |          |                  | O2-Ln1-O5 | 87.1(2)           | 86.9(3)           | O2-Y1-O5  | 86.79(16)        |
|            |                   |                   |          |                  | O2-Ln1-O6 | 93.16(19)         | 92.9(2)           | O2-Y1-O6  | 93.59(16)        |
|            |                   |                   |          |                  | O2-Ln1-O7 | 149.51(18)        | 149.2(2)          | O2-Y1-O7A | 150.25(15)       |
|            |                   |                   |          |                  | O2-Ln1-O8 | 129.7(2)          | 129.5(2)          | O2-Y1-O8  | 129.90(15)       |
|            |                   |                   |          |                  | O3-Ln1-O4 | 53.78(16)         | 53.6(2)           | O3-Y1-O4  | 54.17(13)        |
|            |                   |                   |          |                  | O3-Ln1-O5 | 74.13(19)         | 73.9(2)           | O3-Y1-O5  | 73.88(15)        |
|            |                   |                   |          |                  | O3-Ln1-O6 | 134.07(18)        | 134.4(2)          | O3-Y1-O6  | 134.25(15)       |
|            |                   |                   |          |                  | O3-Ln1-O7 | 79.90(19)         | 81.0(2)           | O3-Y1-O7A | 79.40(15)        |
|            |                   |                   |          |                  | O3-Ln1-O8 | 133.41(19)        | 134.2(2)          | O3-Y1-O8  | 132.59(14)       |
|            |                   |                   |          |                  | O4-Ln1-O5 | 125.29(18)        | 124.9(2)          | O4-Y1-O5  | 125.31(14)       |
|            |                   |                   |          |                  | O4-Ln1-O6 | 81.64(18)         | 82.0(2)           | O4-Y1-O6  | 81.56(14)        |
|            |                   |                   |          |                  | O4-Ln1-O7 | 74.91(18)         | 75.1(2)           | O4-Y1-O7A | 75.54(14)        |
|            |                   |                   |          |                  | O4-Ln1-O8 | 149.6(2)          | 149.7(3)          | O4-Y1-O8  | 149.81(15)       |
|            |                   |                   |          |                  | O5-Ln1-O6 | 151.8(2)          | 151.7(3)          | O5-Y1-O6  | 151.86(16)       |
|            |                   |                   |          |                  | O5-Ln1-O7 | 114.3(2)          | 115.4(3)          | O5-Y1-O7A | 113.38(16)       |
|            |                   |                   |          |                  | O5-Ln1-O8 | 78.6(2)           | 79.3(3)           | O5-Y1-O8  | 78.25(15)        |
|            |                   |                   |          |                  | O6-Ln1-O7 | 78.0(2)           | 77.4(2)           | O6-Y1-O7A | 78.77(15)        |
|            |                   |                   |          |                  | O6-Ln1-O8 | 79.63(19)         | 79.1(3)           | O6-Y1-O8  | 80.06(15)        |
|            |                   |                   |          |                  | O7-Ln1-O8 | 77.9(2)           | 77.9(3)           | O7A-Y1-O8 | 77.53(15)        |

**Table S2** Summary of SHAPE analysis around Ln<sup>III</sup> center(s) for **1** and **2** and Y<sup>III</sup> center(s) in **3** (Ln = Dy for **1**, Ln = Tb for **2**).

| ML <sub>g</sub>                            |                 | <b>1</b>     | <b>2</b>     | <b>3</b>     |
|--------------------------------------------|-----------------|--------------|--------------|--------------|
| Octagon                                    | D <sub>8h</sub> | 30.016       | 29.845       | 30.157       |
| Heptagonal pyramid                         | C <sub>7v</sub> | 21.366       | 21.318       | 21.339       |
| Hexagonal bipyramid                        | D <sub>6h</sub> | 13.123       | 13.242       | 12.963       |
| Cube                                       | O <sub>h</sub>  | 9.958        | 10.036       | 9.788        |
| Square antiprism                           | D <sub>4d</sub> | 2.799        | 2.846        | 2.725        |
| Triangular dodecahedron                    | D <sub>2d</sub> | 3.184        | 3.282        | 3.118        |
| Johnson gyrobifastigium J26                | D <sub>2d</sub> | 12.451       | 12.463       | 12.389       |
| Johnson elongated triangular bipyramid J14 | D <sub>3h</sub> | 25.745       | 25.606       | 25.886       |
| Biaugmented trigonal prism J50             | C <sub>2v</sub> | 2.750        | 2.782        | 2.674        |
| Biaugmented trigonal prism                 | C <sub>2v</sub> | <b>2.210</b> | <b>2.207</b> | <b>2.215</b> |
| Snub diphenoïd J84                         | D <sub>2d</sub> | 4.111        | 4.209        | 4.013        |
| Triakis tetrahedron                        | T <sub>d</sub>  | 10.660       | 10.685       | 10.464       |
| Elongated trigonal bipyramid               | D <sub>3h</sub> | 21.570       | 21.213       | 21.793       |

**Table S3** Parameters obtained from Cole Cole fitting for **1'**

| Temperature (K) | $\chi_{\text{iso}}$ | $\alpha$ | $\tau$                   |
|-----------------|---------------------|----------|--------------------------|
| 1.85            | 0.99474             | 0.33093  | $2.26486 \times 10^{-4}$ |
| 2               | 0.92544             | 0.36166  | $1.06772 \times 10^{-4}$ |
| 2.14            | 0.8818              | 0.3922   | $5.51724 \times 10^{-5}$ |
| 2.29            | 0.8439              | 0.40798  | $3.36914 \times 10^{-5}$ |
| 2.45            | 0.79426             | 0.42295  | $1.86669 \times 10^{-5}$ |
| 2.56            | 0.73978             | 0.43161  | $9.58461 \times 10^{-6}$ |
| 2.71            | 0.70505             | 0.43298  | $5.71799 \times 10^{-6}$ |
| 2.85            | 0.67261             | 0.42897  | $3.55239 \times 10^{-6}$ |
| 3               | 0.64428             | 0.42721  | $2.20762 \times 10^{-6}$ |
| 3.25            | 0.60038             | 0.40931  | $1.13417 \times 10^{-6}$ |

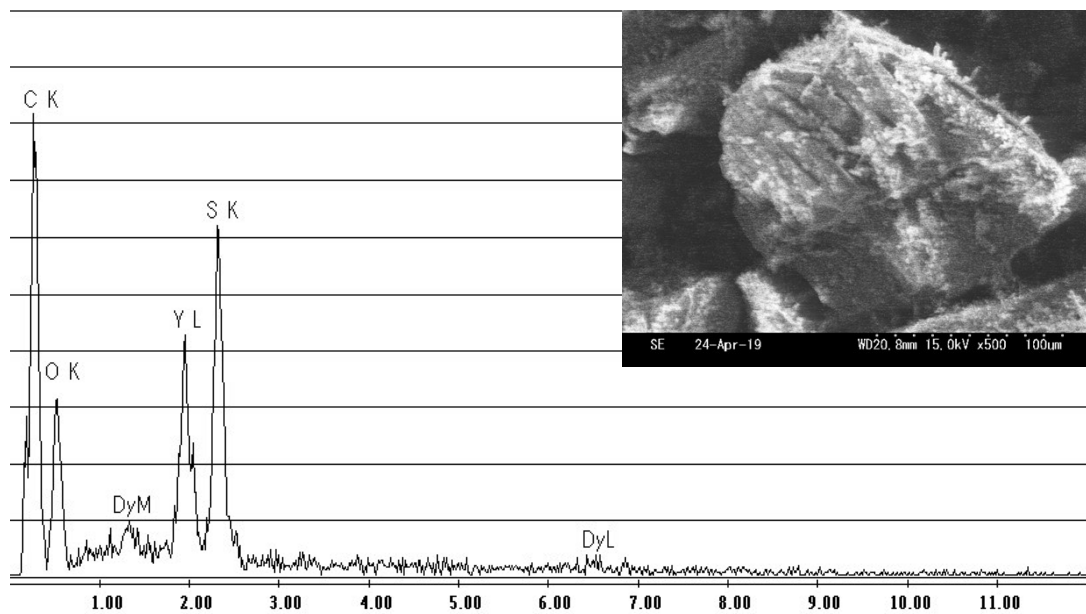

**Fig. S1** EDX spectrum for the compound **1'**. Inset shows the SEM image of the same.

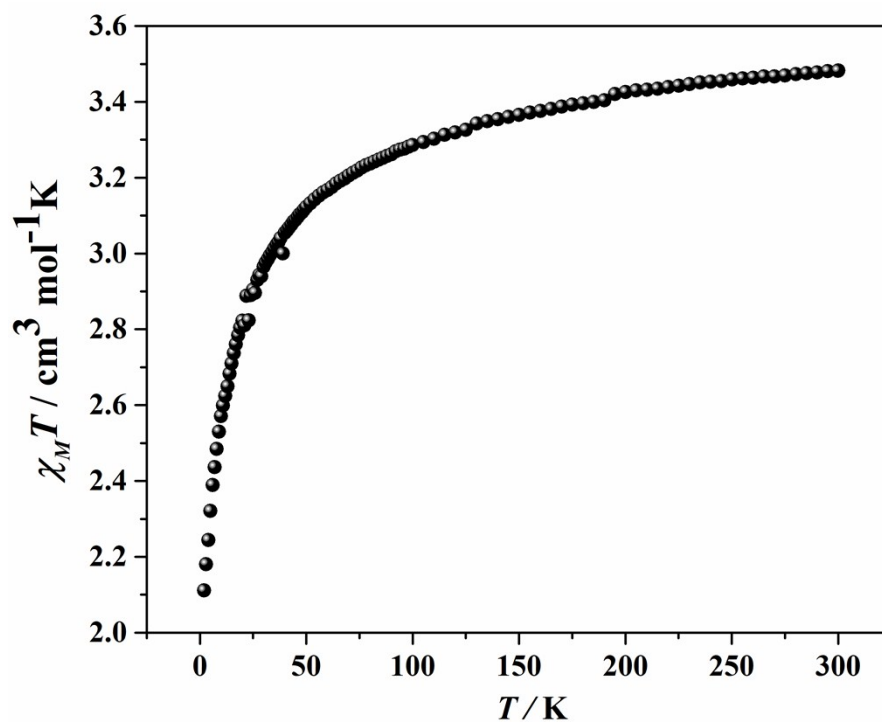

**Fig. S2** Temperature dependence of the  $\chi_M T$  products in 1000 Oe for **1'**.

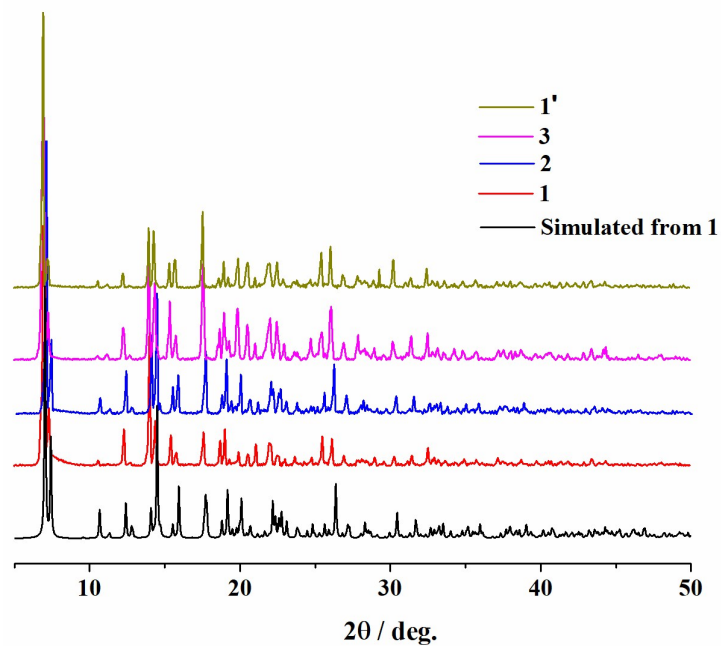

**Fig. S3** Simulated and observed PXRD patterns of the complexes.

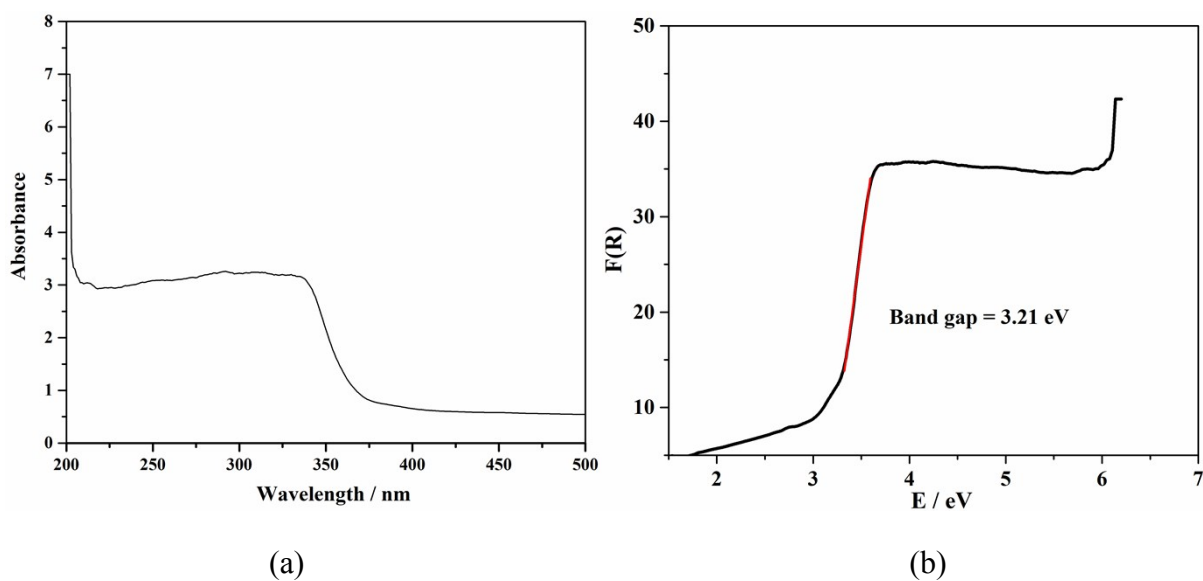

**Fig. S4** (a) UV-VIS absorption spectra for complex **1** and (b) the band gap estimated using Kubelka-Munk function.<sup>1</sup>

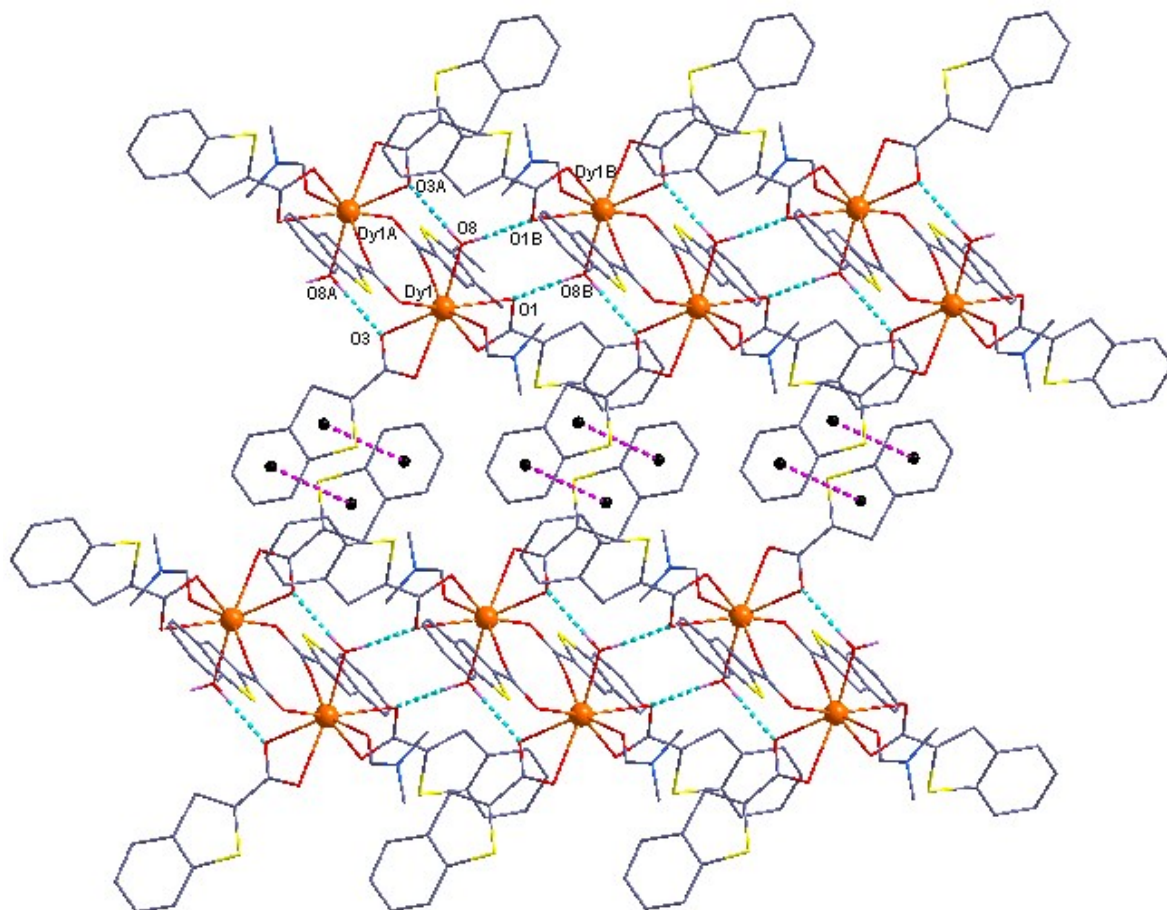

**Fig. S5** Perspective view of two dimensional sheet caused by intermolecular  $\pi \cdots \pi$  stacking interaction and intra- and inter-molecular hydrogen bonding interactions in crystallographic  $ac$  plane for **1**. Hydrogen atoms, except those of the water molecules, are omitted for clarity. Symmetry codes: A,  $2-x, 2-y, 1-z$ ; B,  $1-x, 2-y, 1-z$ .

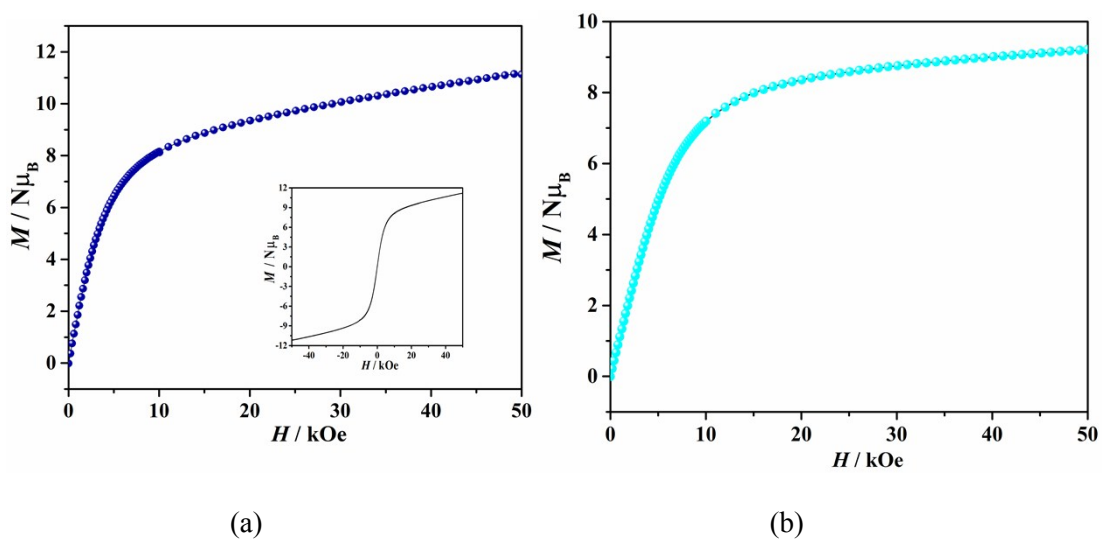

**Fig. S6** Isothermal magnetization plot for (a) **1** (inset: magnetic hysteresis) and (b) **2**.

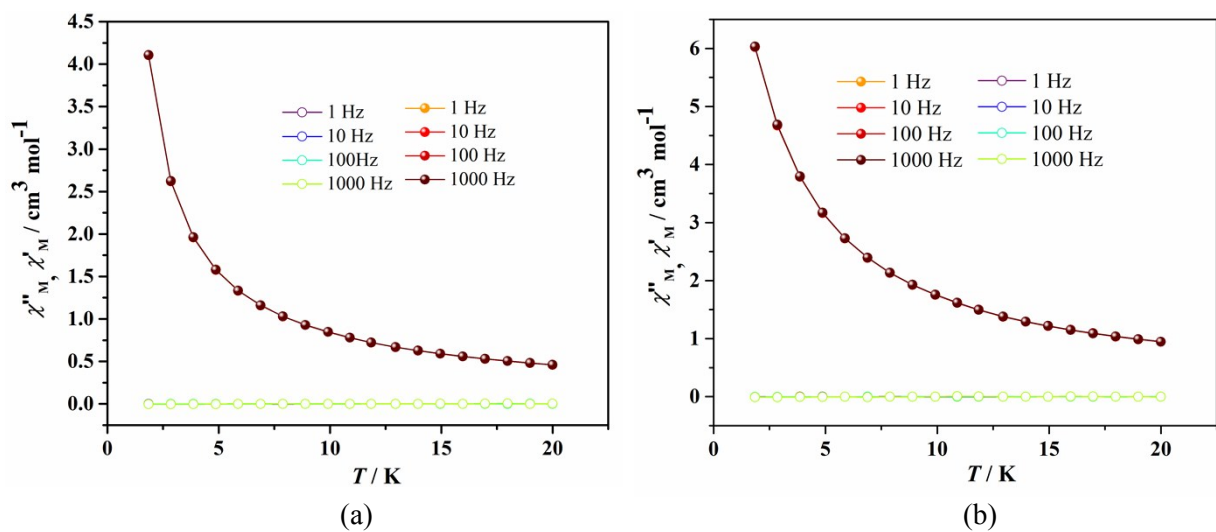

**Fig. S7** Frequency and temperature dependency without dc field for (a) **1** and (b) **2**.

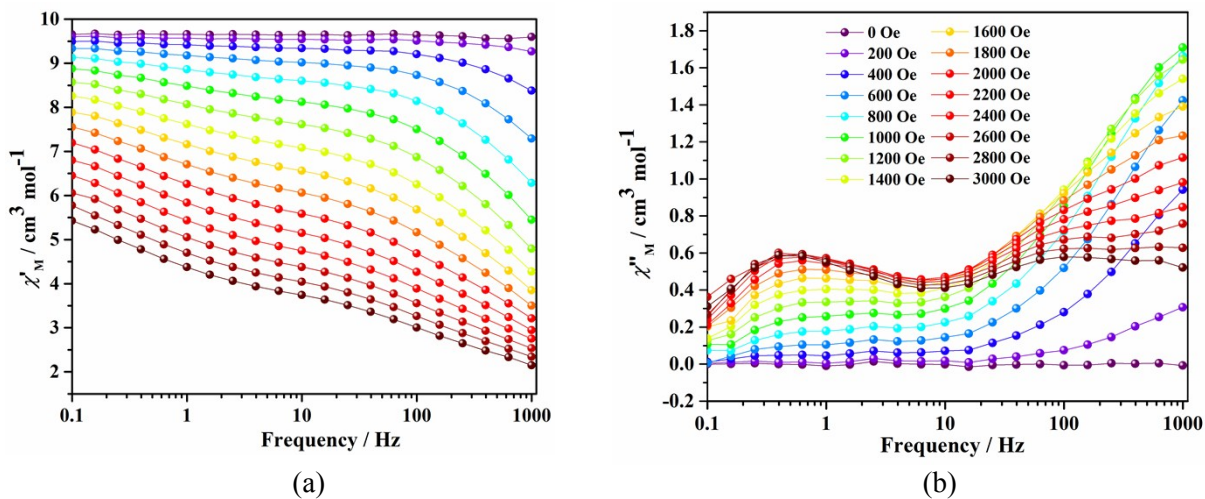

**Fig. S8** Frequency dependency of the (a) in phase and (b) out of phase ac susceptibility under indicated dc fields at 1.85 K for **1**. The indication for the fields for both plots are shown only in (b) for clarity.

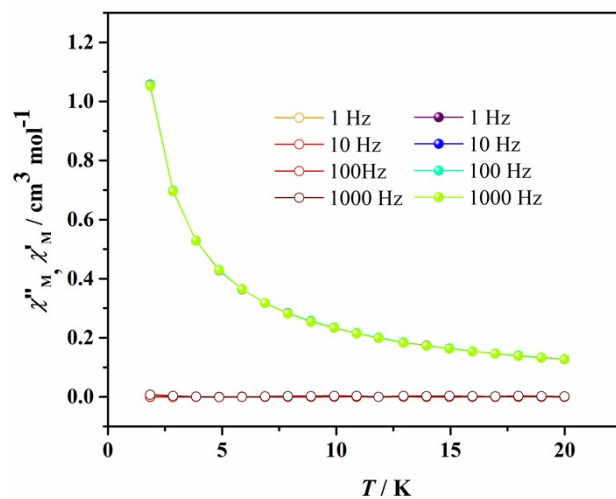

Fig. S9 Frequency and temperature dependency without dc field for **1'**.

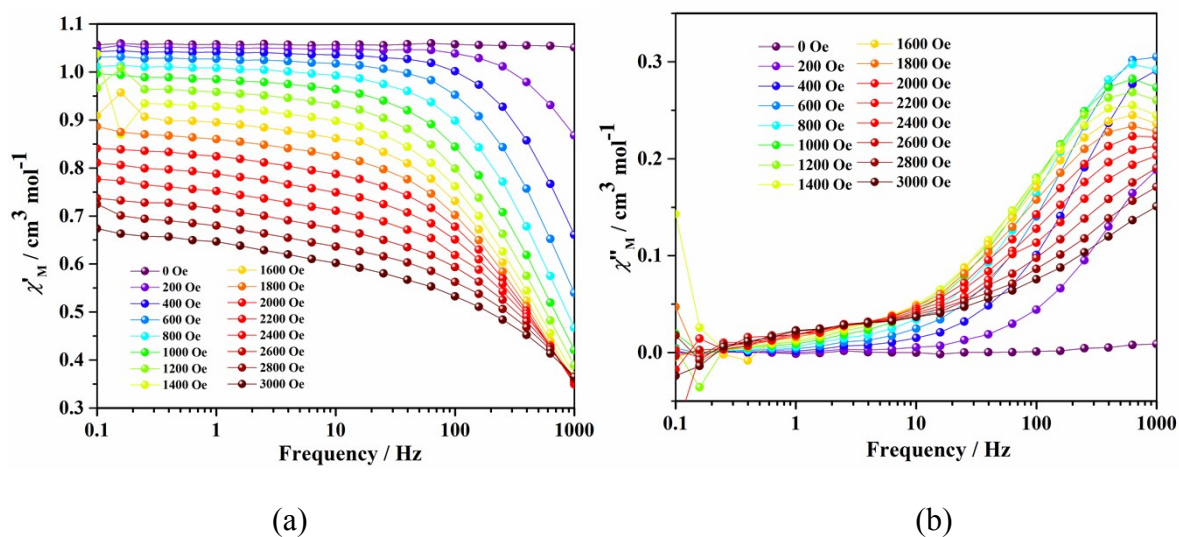

Fig. S10 Frequency dependency of the (a) in phase and (b) out of phase ac susceptibility under indicated dc fields at 1.85K for **1'**.



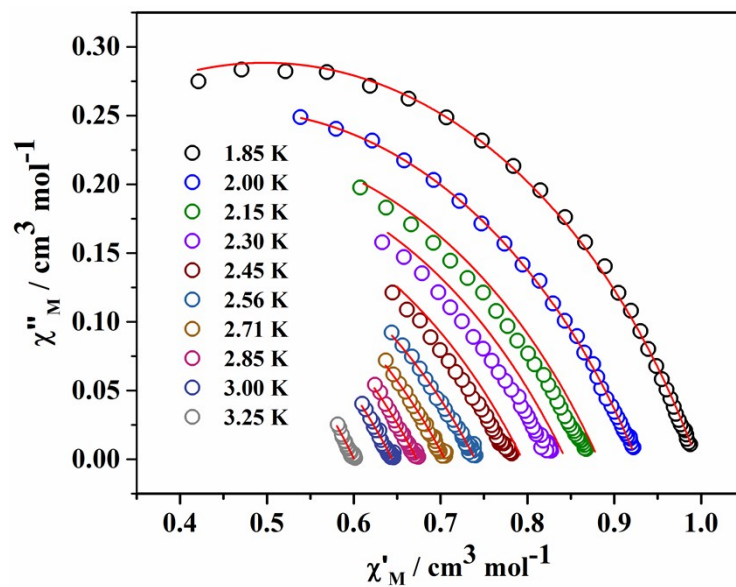

Fig. S11 Cole-Cole plots for **1'** at different temperatures.

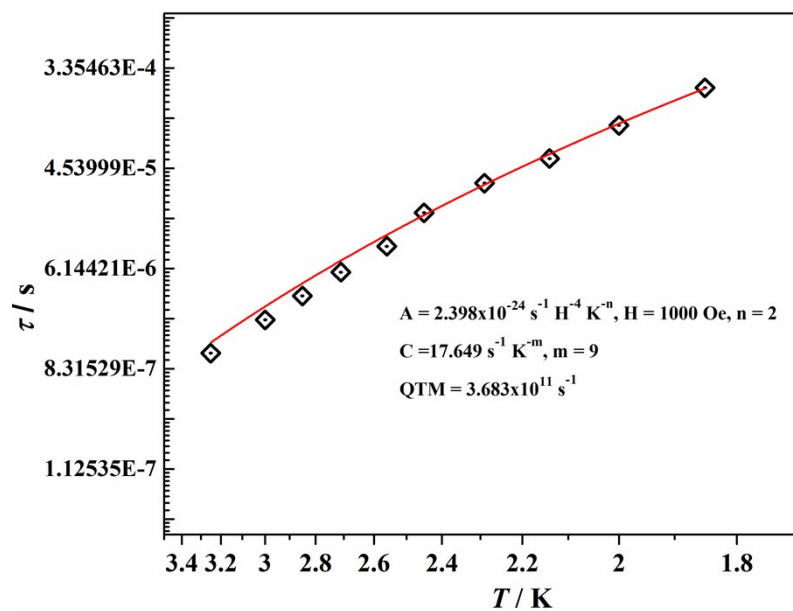

Fig. S12 Temperature dependence of relaxation time for **1'** with quantum tunnelling, direct contributions and Raman process.

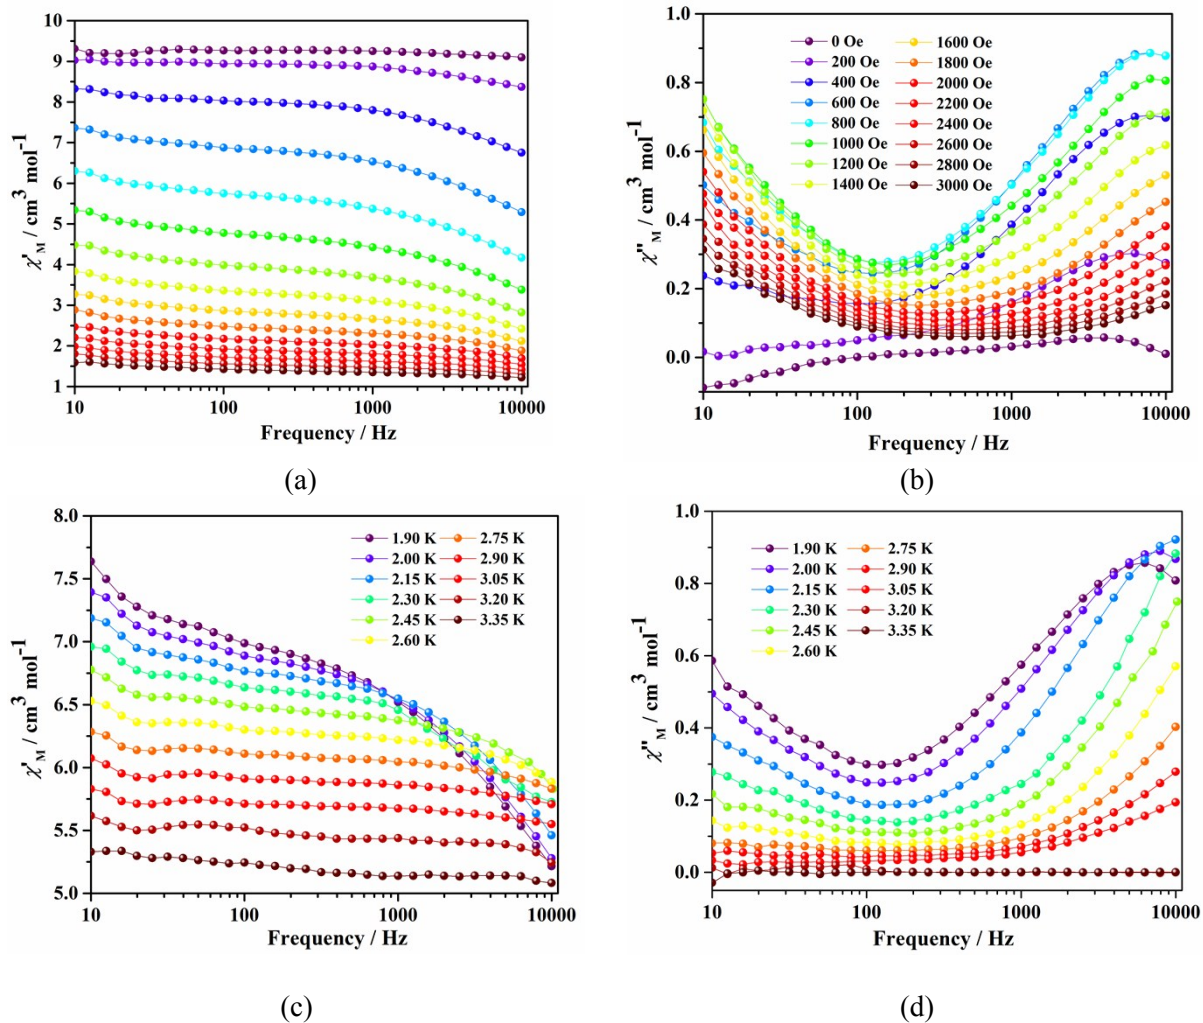

**Fig. S13** Frequency dependency of the (a) in phase and (b) out of phase ac susceptibility under indicated dc fields at 1.85 K (the indication for the fields for both plots are shown only in (b) for clarity) and frequency dependency of the (c) in-phase and (d) out-of-phase components of the ac magnetic susceptibility under 600 Oe dc field for **1** in the high frequency region.

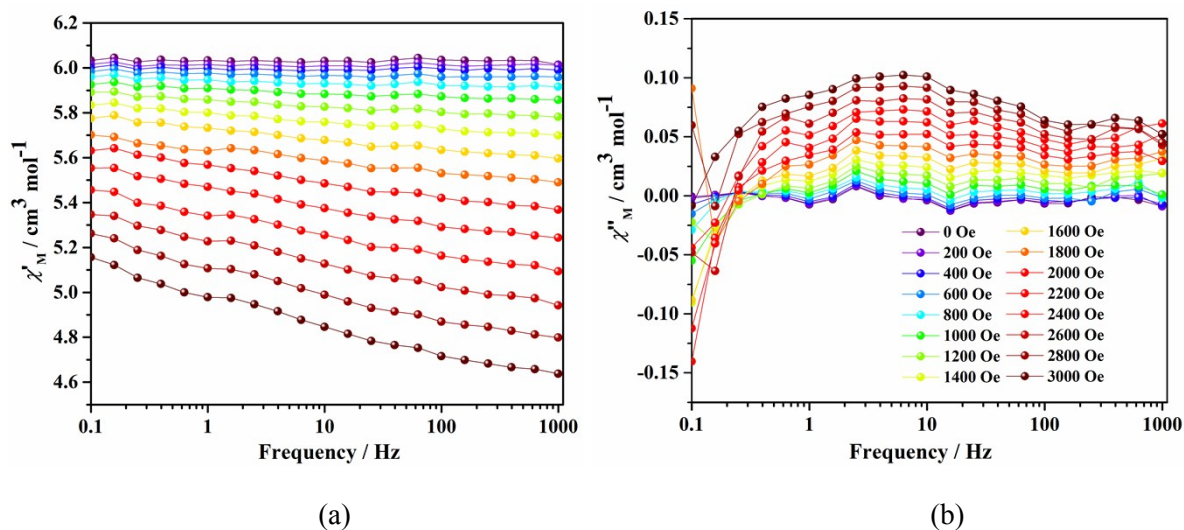

**Fig. S14** Frequency dependency of the (a) in phase and (b) out of phase ac susceptibility under indicated dc fields at 1.85 K for **2**. The indication for the fields for both plots are shown only in (b) for clarity.

References:

- (a) T. Okubo, H. Anma, N. Tanaka, K. Himoto, S. Seki, A. Saeki, M. Maekawa and T. Kuroda-Sowa, *Chem. Commun.*, 2013, **49**, 4316. (b) S. Tominaka, H. Hamoudi, T. Suga, T. D. Bennett, A. B. Cairns and A. K. Cheetham, *Chem. Sci.*, 2015, **6**, 1465.
